# Supplementary material for: Kanyawara Virus: A Novel Rhabdovirus Infecting Newly Discovered Nycteribiid Bat Flies Infesting Previously Unknown Pteropodid Bats in Uganda
Source: PubMed Central journal article supplement (PMC5509700; doi:10.1038/s41598-017-05236-w), 2017-07-13
Supplement: 41598_2017_5236_MOESM1_ESM.pdf [file 41598_2017_5236_MOESM1_ESM.pdf]

## Supplementary information

**Title:** *Kanyawara Virus: A Novel Rhabdovirus Infecting Newly Discovered Nycteribiid Bat Flies Infesting Previously Unknown Pteropodid Bats in Uganda*

Tony L. Goldberg<sup>a,b,c,\*</sup>, Andrew J. Bennett<sup>a</sup>, Robert Kityo<sup>c</sup>, Jens H. Kuhn<sup>d</sup>, and Colin A. Chapman<sup>c,e</sup>

- a. Department of Pathobiological Sciences, University of Wisconsin-Madison, Madison, Wisconsin 53706, USA
- b. Global Health Institute, University of Wisconsin-Madison, Madison, Wisconsin 53706, USA
- c. Department of Zoology, Makerere University, Kampala, Uganda
- d. Integrated Research Facility at Fort Detrick, National Institute of Allergy and Infectious Diseases, National Institutes of Health, Frederick, Maryland 21702, USA
- e. Department of Anthropology and School of Environment, McGill University, Montreal, Quebec H3A 2T7, Canada

\*Corresponding author: Tony L. Goldberg, email: [tony.goldberg@wisc.edu](mailto:tony.goldberg@wisc.edu).

### Supplementary information includes:

1. Table S1: Sequences used for analyses
2. Table S2: Relative CpG dinucleotide frequencies of 62 rhabdoviruses  
(*Mononegavirales: Rhabdoviridae*)

**Table S1: Sequences used for analyses**

| Bats (Chiroptera: Megachiroptera: Pteropodidae)                           |                                  |             |                                                                                                               |                                       |
|---------------------------------------------------------------------------|----------------------------------|-------------|---------------------------------------------------------------------------------------------------------------|---------------------------------------|
| Taxon                                                                     | Location                         | Year        | Host                                                                                                          | Accession numbers (COI, CYTB)         |
| Angolan soft-furred fruit bat ( <i>Myonycteris angolensis ruwenzori</i> ) | Democratic Republic of the Congo | 2009        | N/A                                                                                                           | JX282941, JX283240                    |
| Angolan soft-furred fruit bat ( <i>Myonycteris angolensis smithii</i> )   | Cote d'Ivoire                    | 2009        | N/A                                                                                                           | JX282939, JX283228                    |
| Bergmans's collared fruit bat ( <i>Myonycteris relicta</i> )              | Tanzania                         | 2001        | N/A                                                                                                           | JX282952, JX283220                    |
| Franquet's epauletted fruit bat ( <i>Epomops franqueti</i> )              | Gabon                            | 2005        | N/A                                                                                                           | JX282938, JX283288                    |
| Little collared fruit bat ( <i>Myonycteris torquata</i> )                 | Cameroon                         | 2007        | N/A                                                                                                           | JX283142, JX283138                    |
| <b>Newly discovered bat (<i>Myonycteris</i> sp.)</b>                      | <b>Uganda</b>                    | <b>2010</b> | <b>N/A</b>                                                                                                    | <b>KY385387, KY385388</b>             |
| São Tomé collared fruit bat ( <i>Myonycteris brachycephala</i> )          | São Tomé and Príncipe            | 1989        | N/A                                                                                                           | JX282951, JX283222                    |
| Sierra Leone collared fruit bat ( <i>Myonycteris leptodon</i> )           | Côte d'Ivoire                    | 2009        | N/A                                                                                                           | JX282958, JX283218                    |
| Western Woermann's fruit bat ( <i>Megaloglossus azagnyi</i> )             | Côte d'Ivoire                    | 2009        | N/A                                                                                                           | JX282948, JX283271                    |
| Woermann's long-tongued fruit bat ( <i>Megaloglossus woermanni</i> )      | Cameroon                         | 2007        | N/A                                                                                                           | JX282944, JX283247                    |
| Bat flies (Diptera: Hippoboscoidea)                                       |                                  |             |                                                                                                               |                                       |
| Taxon                                                                     | Location                         | Year        | Host                                                                                                          | Accession numbers (COII, CYTB)        |
| Streblid bat fly ( <i>Ascodipteron phyllorhinae</i> )                     | Malaysia                         | 2003        | Bicolored leaf-nosed bat ( <i>Hipposideros bicolor</i> )                                                      | DQ133113, DQ133149                    |
| Cyclopodiine bat fly ( <i>Cyclopodia horsfeldi</i> )                      | Malaysia                         | 2004        | Variable flying fox ( <i>Pteropus hypomelanus</i> )                                                           | KF273808, KF273720                    |
| Cyclopodiine bat fly ( <i>Dipseliopoda biannulata</i> )                   | Africa                           | unknown     | unknown                                                                                                       | DQ133109, DQ133145                    |
| Cyclopodiine bat fly ( <i>Eucampsipoda inermis</i> )                      | Malaysia                         | 2003        | Lesser dawn bat ( <i>Eonycteris spelaea</i> )                                                                 | DQ133112, DQ133148                    |
| Cyclopodiine bat fly ( <i>Eucampsipoda sundaica</i> )                     | Malaysia                         | 2004        | Large flying fox ( <i>Pteropus vampyrus</i> )                                                                 | KF273833, KF273736                    |
| <b>Newly discovered bat fly (<i>Dipseliopoda</i> sp.)</b>                 | <b>Uganda</b>                    | <b>2010</b> | <b>Newly discovered bat (<i>Myonycteris</i> sp.)</b>                                                          | <b>KY385385, KY385386</b>             |
| Nycteribiine bat fly ( <i>Basilia coronata</i> )                          | Malaysia                         | 2004        | Peters's myotis ( <i>Myotis ater</i> )                                                                        | DQ133107, DQ133143                    |
| Nycteribiine bat fly ( <i>Basilia forcipata</i> )                         | United States of America         | 2003        | Long-legged myotis ( <i>Myotis volans</i> )                                                                   | DQ133100, DQ133136                    |
| Nycteribiine bat fly ( <i>Phthiridium fraterna</i> )                      | Malaysia                         | 2004        | Bicolored leaf-nosed bat ( <i>Hipposideros bicolor</i> )                                                      | DQ133094, DQ133130                    |
| Rhabdoviruses (Mononegavirales: Rhabdoviridae)                            |                                  |             |                                                                                                               |                                       |
| Taxon                                                                     | Location                         | Year        | Host                                                                                                          | Accession number (full coding genome) |
| Barur virus ( <i>Barur ledantavirus</i> )                                 | India                            | 1962        | Roof rat ( <i>Rattus rattus wroughtoni</i> )                                                                  | KM204983                              |
| Fikirini virus ( <i>Fikirini ledantavirus</i> )                           | Kenya                            | 2011        | Striped leaf-nosed bat ( <i>Hipposideros vittatus</i> )                                                       | KC676792                              |
| Fukuoka virus ( <i>Fukuoka ledantavirus</i> )                             | Japan                            | 1982        | Biting midge ( <i>Culicoides punctatus</i> )                                                                  | KM205001                              |
| Kern Canyon virus ( <i>Kern Canyon ledantavirus</i> )                     | United States of America         | 1956        | Yuma myotis ( <i>Myotis yumanensis</i> )                                                                      | KM204992                              |
| Keuraliba virus ( <i>Keuraliba ledantavirus</i> )                         | Senegal                          | 1968        | Northern savanna gerbil ( <i>Gerbilliscus kempfi</i> )                                                        | KM205021                              |
| Kolente virus ( <i>Kolente ledantavirus</i> )                             | Guinea                           | 1985        | Jones's leaf-nosed bat ( <i>Hipposideros jonesi</i> ) and tropical bont ticks ( <i>Amblyomma variegatum</i> ) | KC984953                              |
| Kumasi rhabdovirus ( <i>Kumasi ledantavirus</i> )                         | Ghana                            | 2011        | African straw-colored fruit bat ( <i>Eidolon helvum</i> )                                                     | KJ179955                              |
| Le Dantec virus ( <i>Le Dantec ledantavirus</i> )                         | Senegal                          | 1965        | Human ( <i>Homo sapiens</i> )                                                                                 | KM205006                              |
| Mount Elgon bat virus ( <i>Mount Elgon bat ledantavirus</i> )             | Kenya                            | 1964        | Hildebrandt's horseshoe bat ( <i>Rhinolophus hildebrandtii</i> )                                              | KM205026                              |
| <b>Newly discovered Kanyawara virus (<i>Ledantavirus</i> sp.)</b>         | <b>Uganda</b>                    | <b>2010</b> | <b>Newly discovered bat fly (<i>Dipseliopoda</i> sp.) or bat (<i>Myonycteris</i> sp.)</b>                     | <b>KY385390</b>                       |
| Nishimuro virus ( <i>Nishimuro ledantavirus</i> )                         | Japan                            | 2009        | Wild boar ( <i>Sus scrofa</i> )                                                                               | AB609604                              |
| Nkolbisson virus ( <i>Nkolbisson ledantavirus</i> )                       | Cameroon                         | 1965        | Mosquito ( <i>Eretmapodites leucopus</i> )                                                                    | KM205017                              |
| Oita virus ( <i>Oita ledantavirus</i> )                                   | Japan                            | 1972        | Little Japanese horseshoe bat ( <i>Rhinolophus cornutus</i> )                                                 | KM204998                              |
| Vesicular stomatitis Indiana virus ( <i>Indiana vesiculovirus</i> )       | United States of America         | 1998        | Horse ( <i>Equus caballus</i> )                                                                               | AF473864                              |
| Wùhàn louse fly virus 5 ( <i>Wuhan ledantavirus</i> )                     | China                            | 2011        | Louse fly (unidentified hippoboscid)                                                                          | KM817654                              |
| Yòngjiā tick virus 2 ( <i>Yongjia ledantavirus</i> )                      | China                            | 2013        | East Asian mountain haemaphysalid tick ( <i>Haemaphysalis hystricis</i> )                                     | KM817662                              |

**Table S2:** Relative CpG dinucleotide frequencies of 62 rhabdoviruses (*Mononegavirales: Rhabdoviridae*)

| Virus                                 | Genus or group                            | GenBank/RefSeq accession number | Relative CpG dinucleotide frequency (by gene) |              |              |              |              |
|---------------------------------------|-------------------------------------------|---------------------------------|-----------------------------------------------|--------------|--------------|--------------|--------------|
|                                       |                                           |                                 | N                                             | P            | M            | G            | L            |
| Adelaide River virus                  | <i>Ephemerovirus</i>                      | NC028246                        | 0.439                                         | 0.596        | 0.530        | 0.392        | 0.427        |
| Berrimah virus                        | <i>Ephemerovirus</i>                      | NC025358                        | 0.331                                         | 0.413        | 0.276        | 0.415        | 0.364        |
| Bovine ephemeral fever virus          | <i>Ephemerovirus</i>                      | NC002526                        | 0.293                                         | 0.271        | 0.100        | 0.400        | 0.381        |
| Kimberley virus                       | <i>Ephemerovirus</i>                      | NC025396                        | 0.444                                         | 0.360        | 0.279        | 0.170        | 0.315        |
| Koolpinyah virus                      | <i>Ephemerovirus</i>                      | NC028239                        | 0.232                                         | 0.269        | 0.267        | 0.301        | 0.232        |
| Kotonkan virus                        | <i>Ephemerovirus</i>                      | NC017714                        | 0.279                                         | 0.423        | 0.161        | 0.399        | 0.359        |
| Malakal virus                         | <i>Ephemerovirus</i>                      | NC025400                        | 0.330                                         | 0.253        | 0.235        | 0.295        | 0.309        |
| Obodhiang virus                       | <i>Ephemerovirus</i>                      | NC017685                        | 0.388                                         | 0.323        | 0.458        | 0.241        | 0.381        |
| Yata virus                            | <i>Ephemerovirus</i>                      | NC028241                        | 0.322                                         | 0.276        | 0.416        | 0.235        | 0.363        |
| Flanders virus                        | <i>Hapavirus</i>                          | NC028235                        | 0.520                                         | 0.329        | 0.297        | 0.414        | 0.395        |
| Hart Park virus                       | <i>Hapavirus</i>                          | KM205011                        | 0.365                                         | 0.358        | 0.447        | 0.504        | 0.444        |
| Ngaingan virus                        | <i>Hapavirus</i>                          | NC013955                        | 0.358                                         | 0.302        | 0.488        | 0.358        | 0.403        |
| Wongabel virus                        | <i>Hapavirus</i>                          | NC011639                        | 0.428                                         | 0.184        | 0.180        | 0.425        | 0.454        |
| Barur virus                           | <i>Ledantevirus</i>                       | KM204983                        | 0.237                                         | 0.242        | 0.283        | 0.287        | 0.301        |
| Fikirini bat rhabdovirus              | <i>Ledantevirus</i>                       | NC025341                        | 0.608                                         | 0.627        | 0.493        | 0.528        | 0.494        |
| Fukuoka virus                         | <i>Ledantevirus</i>                       | KM205001                        | 0.078                                         | 0.168        | 0.162        | 0.182        | 0.234        |
| <b>Kanyawara virus</b>                | <b>Unclassified ledantevirus</b>          | <b>KY385390</b>                 | <b>0.698</b>                                  | <b>0.417</b> | <b>0.447</b> | <b>0.541</b> | <b>0.555</b> |
| Kern Canyon virus                     | <i>Ledantevirus</i>                       | KM204992                        | 0.176                                         | 0.239        | 0.185        | 0.347        | 0.332        |
| Keuraliba virus                       | <i>Ledantevirus</i>                       | KM205021                        | 0.330                                         | 0.408        | 0.462        | 0.254        | 0.398        |
| Kolente virus                         | <i>Ledantevirus</i>                       | NC025342                        | 0.538                                         | 0.680        | 0.709        | 0.579        | 0.542        |
| Kumasi rhabdovirus                    | <i>Ledantevirus</i>                       | NC028236                        | 0.569                                         | 0.354        | 0.280        | 0.471        | 0.496        |
| Le Dantec virus                       | <i>Ledantevirus</i>                       | KM205006                        | 0.362                                         | 0.321        | 0.404        | 0.324        | 0.362        |
| Mount Elgon bat virus                 | <i>Ledantevirus</i>                       | KM205026                        | 0.333                                         | 0.500        | 0.143        | 0.382        | 0.418        |
| Nishimuro virus                       | <i>Ledantevirus</i>                       | AB609604                        | 0.237                                         | 0.247        | 0.303        | 0.260        | 0.287        |
| Nkolbisson virus                      | <i>Ledantevirus</i>                       | KM205017                        | 0.397                                         | 0.491        | 0.477        | 0.360        | 0.474        |
| Oita virus                            | <i>Ledantevirus</i>                       | KM204998                        | 0.719                                         | 0.472        | 0.382        | 0.507        | 0.536        |
| Aravan virus                          | <i>Lyssavirus</i>                         | NC020808                        | 0.420                                         | 0.395        | 0.417        | 0.494        | 0.396        |
| Australian bat lyssavirus             | <i>Lyssavirus</i>                         | NC003243                        | 0.619                                         | 0.504        | 0.611        | 0.525        | 0.432        |
| Bokeloh bat lyssavirus                | <i>Lyssavirus</i>                         | NC025251                        | 0.501                                         | 0.325        | 0.490        | 0.473        | 0.379        |
| Duvenhage virus                       | <i>Lyssavirus</i>                         | NC020810                        | 0.523                                         | 0.451        | 0.387        | 0.416        | 0.394        |
| European bat lyssavirus 1             | <i>Lyssavirus</i>                         | NC009527                        | 0.372                                         | 0.353        | 0.344        | 0.319        | 0.418        |
| European bat lyssavirus 2             | <i>Lyssavirus</i>                         | NC009528                        | 0.499                                         | 0.482        | 0.389        | 0.525        | 0.471        |
| Ikoma lyssavirus                      | <i>Lyssavirus</i>                         | NC018629                        | 0.539                                         | 0.403        | 0.415        | 0.286        | 0.320        |
| Irkut virus                           | <i>Lyssavirus</i>                         | NC020809                        | 0.325                                         | 0.399        | 0.424        | 0.468        | 0.393        |
| Khujand lyssavirus                    | <i>Lyssavirus</i>                         | NC025385                        | 0.545                                         | 0.507        | 0.450        | 0.469        | 0.388        |
| Lagos bat virus                       | <i>Lyssavirus</i>                         | NC020807                        | 0.411                                         | 0.262        | 0.446        | 0.416        | 0.421        |
| Lyssavirus Ozernoe                    | Unclassified lyssavirus                   | NC025408                        | 0.375                                         | 0.268        | 0.483        | 0.495        | 0.425        |
| Mokola virus                          | <i>Lyssavirus</i>                         | NC006429                        | 0.523                                         | 0.397        | 0.442        | 0.464        | 0.384        |
| Rabies virus                          | <i>Lyssavirus</i>                         | NC001542                        | 0.577                                         | 0.453        | 0.568        | 0.515        | 0.441        |
| Shimoni bat virus                     | <i>Lyssavirus</i>                         | NC025365                        | 0.276                                         | 0.315        | 0.383        | 0.333        | 0.329        |
| West Caucasian bat virus              | <i>Lyssavirus</i>                         | NC025377                        | 0.399                                         | 0.368        | 0.399        | 0.388        | 0.410        |
| Drosophila melanogaster sigmavirus    | <i>Sigmavirus</i>                         | NC013135                        | 0.783                                         | 0.589        | 0.607        | 0.506        | 0.539        |
| Drosophila obscura sigmavirus         | <i>Sigmavirus</i>                         | NC022580                        | 0.690                                         | 0.651        | 0.351        | 0.541        | 0.512        |
| Shāyáng fly virus 2                   | <i>Sigmavirus</i>                         | NC031215                        | 0.612                                         | 0.632        | 0.927        | 0.671        | 0.669        |
| Wūhàn fly virus 2                     | <i>Sigmavirus</i>                         | NC031278                        | 0.768                                         | 0.730        | 0.558        | 0.743        | 0.629        |
| Wūhàn house fly virus 1               | <i>Sigmavirus</i>                         | NC031282                        | 0.706                                         | 0.745        | 0.641        | 0.807        | 0.735        |
| Niakha virus                          | <i>Sripuvirus</i> (Sandjimba virus group) | NC025405                        | 0.383                                         | 0.543        | 0.307        | 0.338        | 0.433        |
| Oak Vale virus                        | Unclassified (Sandjimba virus group)      | NC025399                        | 0.602                                         | 0.476        | 0.539        | 0.440        | 0.451        |
| Sunguru virus                         | Unclassified (Sandjimba virus group)      | NC025401                        | 0.573                                         | 0.464        | 0.621        | 0.602        | 0.443        |
| Walkabout Creek virus                 | Unclassified (Sandjimba virus group)      | NC028232                        | 0.596                                         | 0.735        | 0.847        | 0.668        | 0.552        |
| Chandipura virus                      | <i>Vesiculovirus</i>                      | NC020805                        | 0.582                                         | 0.435        | 0.574        | 0.415        | 0.596        |
| Cocal virus                           | <i>Vesiculovirus</i>                      | NC028255                        | 0.606                                         | 0.436        | 0.516        | 0.518        | 0.566        |
| Isfahan virus                         | <i>Vesiculovirus</i>                      | NC020806                        | 0.466                                         | 0.572        | 0.289        | 0.462        | 0.518        |
| Jurona virus                          | <i>Vesiculovirus</i>                      | NC025392                        | 0.608                                         | 0.489        | 0.473        | 0.427        | 0.543        |
| Malpais Spring virus                  | <i>Vesiculovirus</i>                      | NC025364                        | 0.453                                         | 0.688        | 0.573        | 0.534        | 0.563        |
| Maraba virus                          | <i>Vesiculovirus</i>                      | NC025255                        | 0.416                                         | 0.487        | 0.623        | 0.492        | 0.569        |
| Morretton virus                       | <i>Vesiculovirus</i>                      | KM205007                        | 0.498                                         | 0.351        | 0.505        | 0.527        | 0.567        |
| Perinet virus                         | <i>Vesiculovirus</i>                      | NC025394                        | 0.302                                         | 0.591        | 0.500        | 0.666        | 0.610        |
| Vesicular stomatitis Alagoas virus    | <i>Vesiculovirus</i>                      | NC025353                        | 0.542                                         | 0.351        | 0.778        | 0.435        | 0.600        |
| Vesicular stomatitis Indiana virus    | <i>Vesiculovirus</i>                      | AF473866                        | 0.571                                         | 0.472        | 0.599        | 0.249        | 0.510        |
| Vesicular stomatitis New Jersey virus | <i>Vesiculovirus</i>                      | NC024473                        | 0.584                                         | 0.389        | 0.529        | 0.340        | 0.443        |
| Yug Bogdanovac virus                  | <i>Vesiculovirus</i>                      | NC025378                        | 0.676                                         | 0.505        | 0.750        | 0.674        | 0.664        |
